# Supplementary material
Source: PubMed Central journal article supplement (PMC2974058)
Supplement: NIHMS222977-supplement-supplement_1.pdf [file NIHMS222977-supplement-supplement_1.pdf]

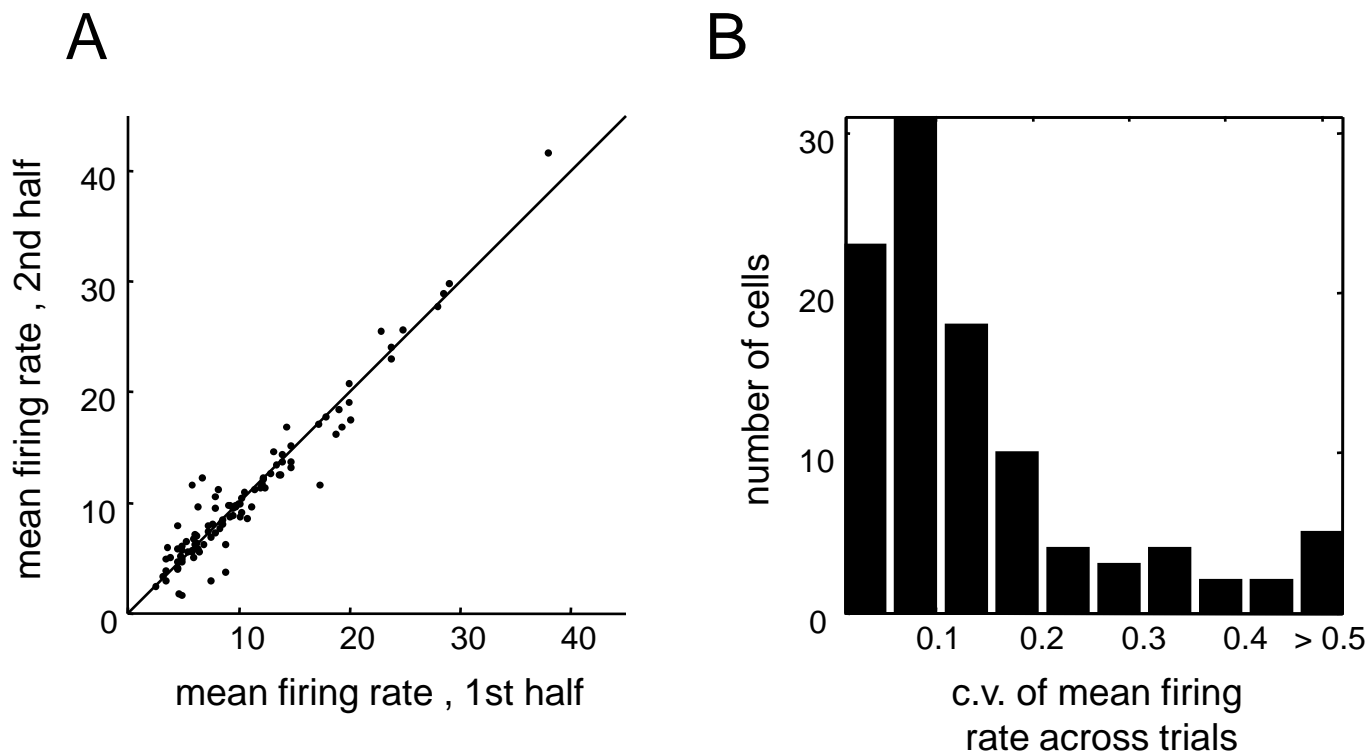

## Figure Legends, Supplemental Information

### **Figure S1**

Mean firing rates were generally stable through the duration of experimental recordings. Panel A: comparison of mean firing rates for the first and second halves of the data collection period for the 102 recorded neurons. Panel B: distribution of the coefficient of variation (standard deviation divided by mean) of mean firing rates across trials for these neurons.
